# Supplementary material for: The Cerebellum Gets Social: Evidence from an Exploratory Study of Cerebellar, Neurodevelopmental, and Psychiatric Disorders
Source: MDPI journal article supplement (doi:10.3390/biomedicines11020309), 2023-01-22
Supplement: s1 [file s1]

**Table S1. Current pharmacotherapy of BD2 patients.**

| Group | Antipsychotics | Lithium | Antiepileptics | Antidepressants | Anxiolytic | Polypharmacy |
|-------|----------------|---------|----------------|-----------------|------------|--------------|
| BD2   | 7              | 7       | 10             | 1               | 3          | 8            |

Number of BD patients taking the medication. Polypharmacy = Patients taking at least two different types of medication.

**Table S2. Results of MANCOVA and pairwise comparisons between HS, BD2, CB and ASD in the Social Cognition tests.**

| MANCOVA                     | RMET   | EA     | FP stories | No-FP stories | Cognitive Comp. | Affective Comp. |
|-----------------------------|--------|--------|------------|---------------|-----------------|-----------------|
| <i>Group effect</i>         | 0.000* | 0.001* | 0.000*     | 0.581         | 0.000*          | 0.054*          |
| <i>Pairwise comparisons</i> |        |        |            |               |                 |                 |
| CB vs. HS-SC                | 0.001* | 0.159  | 0.012*     | 1.00          | 0.003*          | 1.00            |
| ASD vs. HS-SC               | 0.000* | 0.002* | 0.054*     | 1.00          | 0.033*          | 1.00            |
| BD2 vs. HS-SC               | 0.054* | 1.00   | 0.000*     | 1.00          | 0.000*          | 0.051*          |
| CB vs. ASD                  | 1.00   | 1.00   | 1.00       | 1.00          | 1.00            | 1.00            |
| CB vs. BD2                  | 1.00   | 1.00   | 0.272      | 1.00          | 0.374           | 0.239           |
| ASD vs. BD2                 | 1.00   | 0.163  | 0.301      | 1.00          | 0.307           | 0.851           |

\*Results significant at  $p < 0.05$ ; pairwise comparisons were adjusted using the Bonferroni correction for multiple comparisons.
